# Supplementary material for: Multigenerational Social Housing and Group-Rearing Enhance Female Reproductive Success in Captive Rhesus Macaques (Macaca mulatta)
Source: MDPI journal article supplement (doi:10.3390/biology11070970), 2022-06-27
Supplement: s1 [file s1]

## File S2 - Statistical outcomes

**Table S1.** The statistical outcomes of Wilcoxon rank sum test between breeding group type (i.e. peer vs. multi-generational) and female reproductive success (i.e. birth rate, inter birth rate, offspring survival to first and third year of age) in captive rhesus macaques.

| Variable                                   | Breeding group type |             |                          |             | W      | p-value         |
|--------------------------------------------|---------------------|-------------|--------------------------|-------------|--------|-----------------|
|                                            | Peer group          |             | Multi-generational group |             |        |                 |
|                                            | Mean $\pm$ sd       | N (females) | Mean $\pm$ sd            | N (females) |        |                 |
| Birth rate                                 | 0.47 $\pm$ 0.03     | 129         | 0.74 $\pm$ 0.02          | 229         | 7910   | <b>1.93e-13</b> |
| Inter birth rate                           | 448 $\pm$ 16        | 60          | 425 $\pm$ 7              | 169         | 5528.5 | 0.30            |
| Offspring survival rate to 1st year of age | 0.77 $\pm$ 0.34     | 107         | 0.90 $\pm$ 0.20          | 223         | 13909  | <b>6.94e-03</b> |
| Offspring survival rate to 3rd year of age | 0.74 $\pm$ 0.03     | 107         | 0.86 $\pm$ 0.01          | 223         | 13768  | <b>0.01</b>     |
| Conception                                 | 9.25 $\pm$ 0.53     | 60          | 8.50 $\pm$ 0.23          | 169         | 4611.5 | 0.30            |

**Table S2.** The statistical outcomes of Kruskal-Wallis test between rearing history (i.e. R0 = peer or hand-reared, R1 = group-reared with peer or hand-reared mother, R2 = group-reared) and female reproductive success (i.e. birth rate, inter birth rate, offspring survival to first and third year of age) in captive rhesus macaques.

| Variable                                   | Rearing history          |    |                                                   |     |                   |    | X <sup>2</sup> | p-value     |
|--------------------------------------------|--------------------------|----|---------------------------------------------------|-----|-------------------|----|----------------|-------------|
|                                            | Peer or hand-reared (R0) |    | Group-reared with peer or hand-reared mother (R1) |     | Group-reared (R2) |    |                |             |
|                                            | Mean ± sd                | N  | Mean ± sd                                         | N   | Mean ± sd         | N  |                |             |
| Birth rate                                 | 0.68 ± 0.05              | 35 | 0.77 ± 0.02                                       | 120 | 0.70 ± 0.03       | 74 | 2.97           | 0.23        |
| Inter birth rate                           | 426.9 ± 17.5             | 26 | 421.0 ± 8.4                                       | 99  | 428.2 ± 10.0      | 44 | 1.36           | 0.51        |
| Offspring survival rate to 1st year of age | 0.81 ± 0.05              | 33 | 0.91 ± 0.02                                       | 119 | 0.91 ± 0.02       | 71 | 6.8488         | <b>0.03</b> |
| Offspring survival rate to 3rd year of age | 0.78 ± 0.05              | 33 | 0.87 ± 0.02                                       | 119 | 0.88 ± 0.03       | 71 | 7.419          | <b>0.02</b> |

**Table S3.** The statistical outcomes of Kruskal-Wallis test with Benjamini & Hochberg post-hoc comparison of offspring survival rate to 1<sup>st</sup> and 3<sup>rd</sup> year of age between rearing history conditions (R0, R1, R2).

| Variable                                   |    | R0    | R1    |
|--------------------------------------------|----|-------|-------|
| Offspring survival rate to 1st year of age | R1 | 0.055 | -     |
|                                            | R2 | 0.035 | 0.370 |
| Offspring survival rate to 3rd year of age | R1 | 0.072 | -     |
|                                            | R2 | 0.025 | 0.186 |
