# Supplementary material for: Multigenerational Social Housing and Group-Rearing Enhance Female Reproductive Success in Captive Rhesus Macaques (Macaca mulatta)
Source: MDPI journal article supplement (doi:10.3390/biology11070970), 2022-06-27
Supplement: s1 [file s1]

### File S1 – Age analyses

Note that there was a female age difference between peer (mean age =  $8.6 \pm 0.4$ ,  $N = 129$ ) and multi-generational groups (mean age =  $6.3 \pm 0.3$ ,  $N = 229$ ) (Wilcoxon rank sum test,  $W = 10277$ ,  $p$ -value =  $1.8e-06$ ) (Figure S1.a). Also, females were significantly older in the peer and hand-reared group (R0: mean age =  $13.8 \pm 0.5$  years,  $N = 35$ ) compared with the group-reared females (R1: mean age =  $5.4 \pm 0.2$  years,  $N = 120$ ; R2: mean age =  $4.1 \pm 0.1$  years,  $N = 74$ ) (Kruskal-Wallis test  $X^2 = 98.6$ ,  $p$ -value <  $2.2e-16$ , peer  $N = 129$ , multigenerational  $N = 229$ ; Benjamini & Hochberg post-hoc comparison of R0-R1  $p$ -value <  $2e-16$ , R0-R2  $p$ -value <  $2e-16$ , R1-R2  $p$ -value =  $5.2e-5$ ) (Figure S1.b).

However, we found no correlation between age and birth rate, inter birth interval, offspring survival rate to first and third year of age (Figure S2).

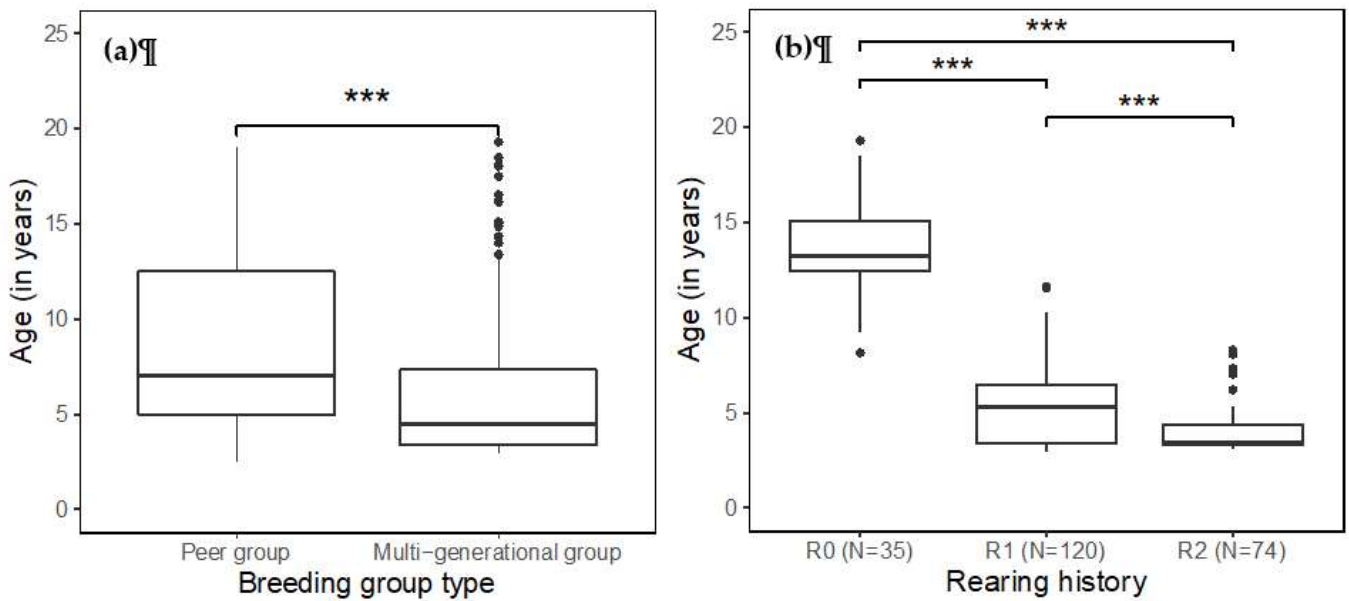

**Figure S1.** Age difference between (a) peer breeding group ( $N = 129$ ) and multi-generational breeding group ( $N = 229$ ) (Wilcoxon rank sum test  $W = 10277$ ,  $p$ -value =  $1.8e-06$ ). (b) Females were older in the hand and peer-reared group (i.e. R0) compared with the and group-reared groups (i.e. R1, R2) (Kruskal-Wallis test  $X^2 = 98.6$ ,  $p$ -value <  $2.2e-16$ , peer  $N = 129$ , multigenerational  $N = 229$ ; Benjamini & Hochberg post-hoc comparison of F0-F1  $p$ -value <  $2e-16$ , R0-R2  $p$ -value <  $2e-16$ , R1-R2  $p$ -value =  $5.2e-5$ , R0:  $N = 35$ , R1  $N = 120$ , R2  $N = 74$ ). \*\*\* indicates  $p \leq 0.001$ .

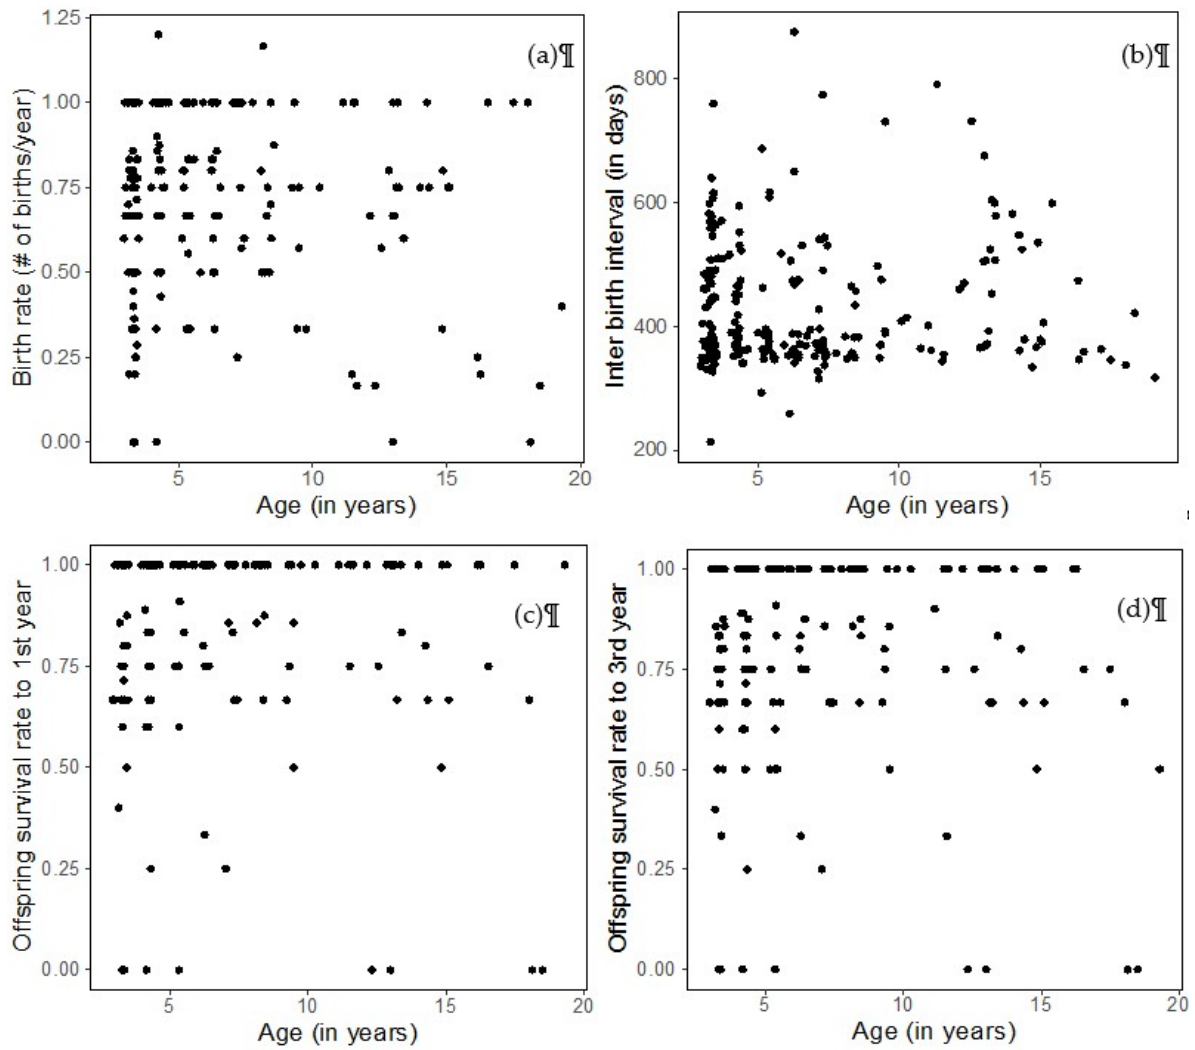

**Figure S2.** Correlation between female age and birth rate, inter birth interval (IBI), survival to first and third year of age. There was no correlation found between female age and **(a)** birth rate (Spearman's rank correlation:  $S = 1820103$ ,  $p$ -value = 0.17,  $N = 229$ ), **(b)** IBI (Spearman's rank correlation:  $S = 2056633$ ,  $p$ -value = 0.68,  $N = 229$ ), **(c)** survival to first (Spearman's rank correlation:  $S = 2096360$ ,  $p$ -value = 0.48,  $N = 229$ ), and **(d)** third year of age (Spearman's rank correlation:  $S = 2108887$ ,  $p$ -value = 0.42,  $N = 229$ ).
